# Supplementary material for: Large area quantitative analysis of nanostructured thin-films
Source: Royal Society of Chemistry journal article supplement (doi:10.1039/c4ra16018e), 2015-01-01
Supplement: c4ra16018e4.pdf [file c4ra16018e4.pdf]

## Supplementary information

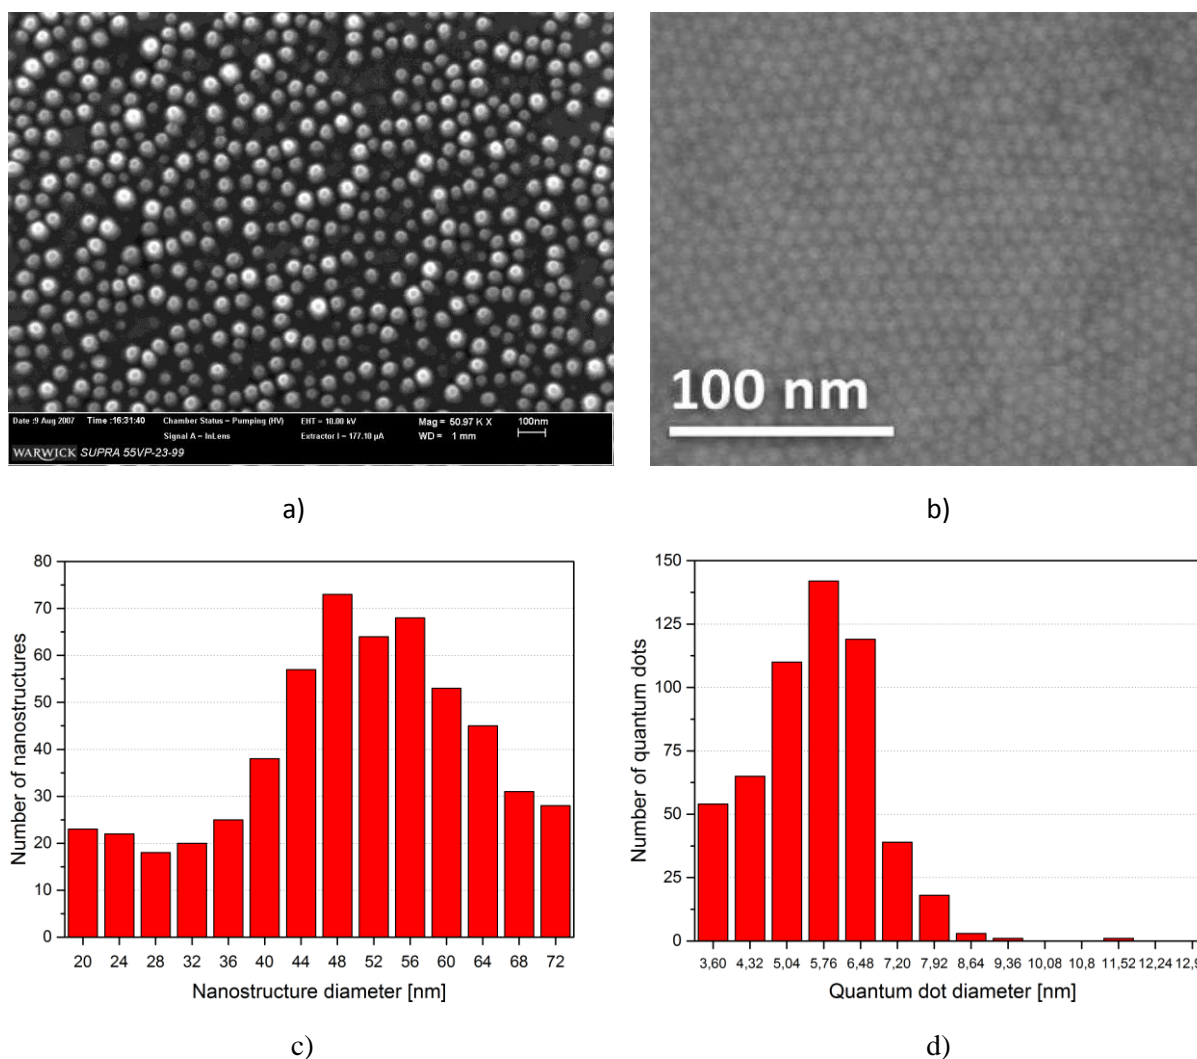

Supplementary figure 1. Analyzed SEM images and their respectful histograms representing software analysis of the size distribution. a) SEM image of nanostructures of ion etched InP, where 1 px = 2 nm b) Deliberate low-quality image of self-assembled gold nanoparticles<sup>1</sup>, where 1 px = 0.36 nm c) Size distribution of InP nanostructures. d) Size distribution of self-assembled gold nanoparticles.

Supplementary table 1. Results achieved during verification process of supplementary figures 1a and 1b

|                                                      | Subject 1 | Subject 2 | Developed program |
|------------------------------------------------------|-----------|-----------|-------------------|
| Counted InP nanostructures (Supplementary Figure 1a) | 543       | 546       | 565               |
| Counted gold nanoparticles (Supplementary Figure 1b) | 551       | 564       | 552               |

[1]. M. Abulikemu, E. H. Da'as, H. Haverinen, D. Cha, M. A. Malik, G.E. Jabbour, Inside Back Cover: In Situ Synthesis of Self-Assembled Gold Nanoparticles on Glass or Silicon Substrates through Reactive Inkjet Printing, *Angewandte Chemie International Edition*, 53(2), 1521-3773.
